# Supplementary material for: Recyclable mesoporous silica-supported chiral ruthenium-(NHC)NN-pincer catalysts for asymmetric reactions
Source: Royal Society of Chemistry journal article supplement (doi:10.1039/c1gc15412e), 2011-01-01
Supplement: c1gc15412e.pdf [file c1gc15412e.pdf]

## SUPPLEMENTARY MATERIAL

### Recyclable Mesoporous Silica-Supported Chiral Ruthenium-(NHC)NN-Pincer Catalysts For Asymmetric Reactions

Carolina del Pozo,<sup>a,b</sup> Avelino Corma,<sup>c</sup> Marta Iglesias,<sup>a\*</sup> and Félix Sánchez<sup>b\*</sup>

#### SELECTED SPECTRA

FT-IR spectra

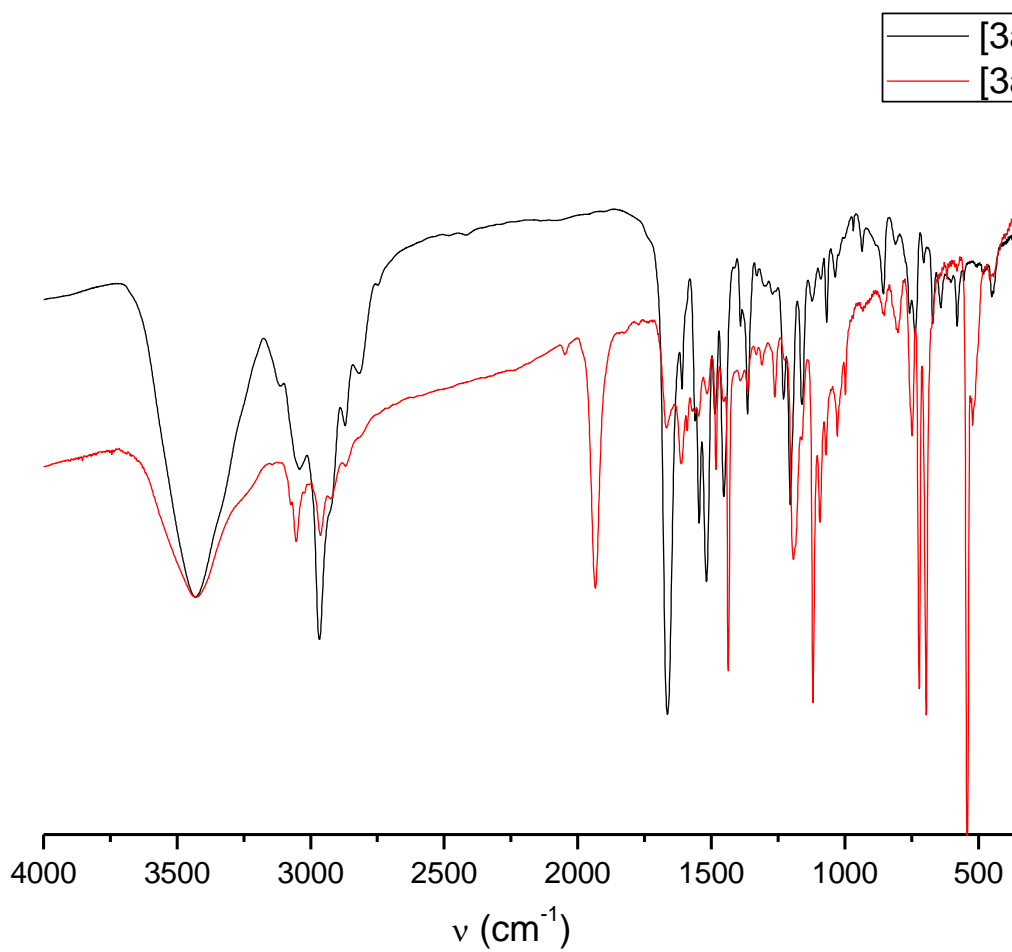

Figure S1

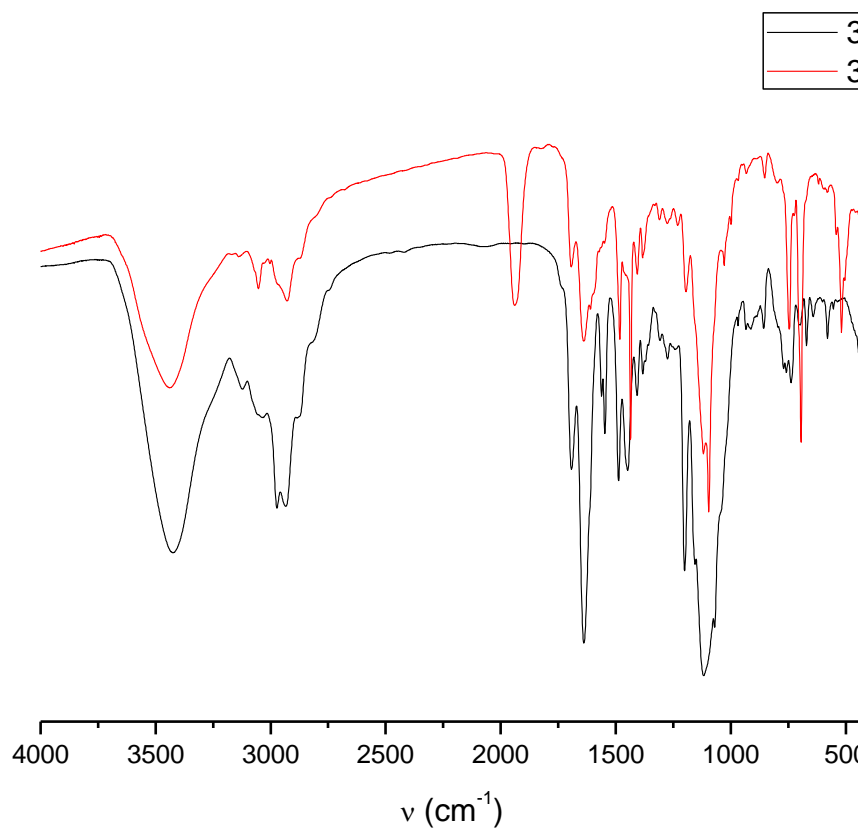

Figure S2

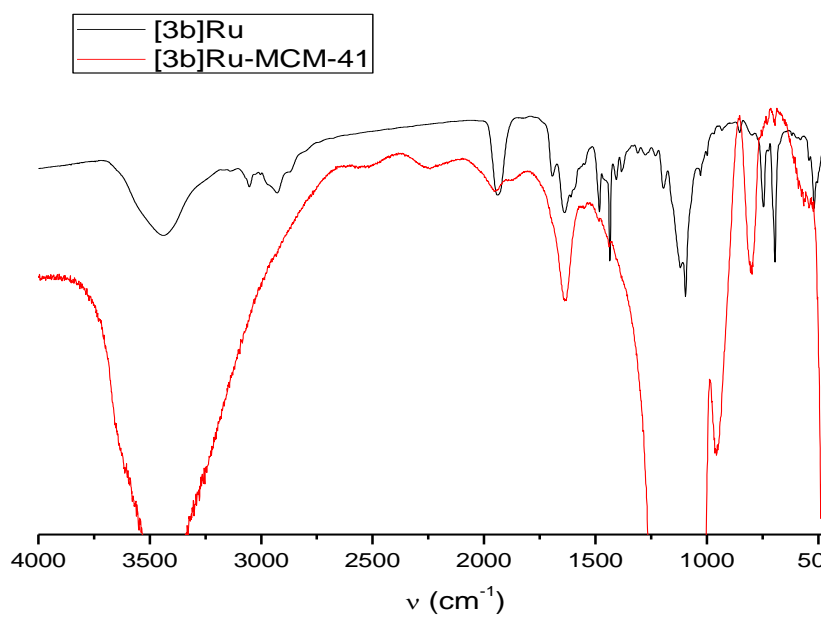

Figure S3

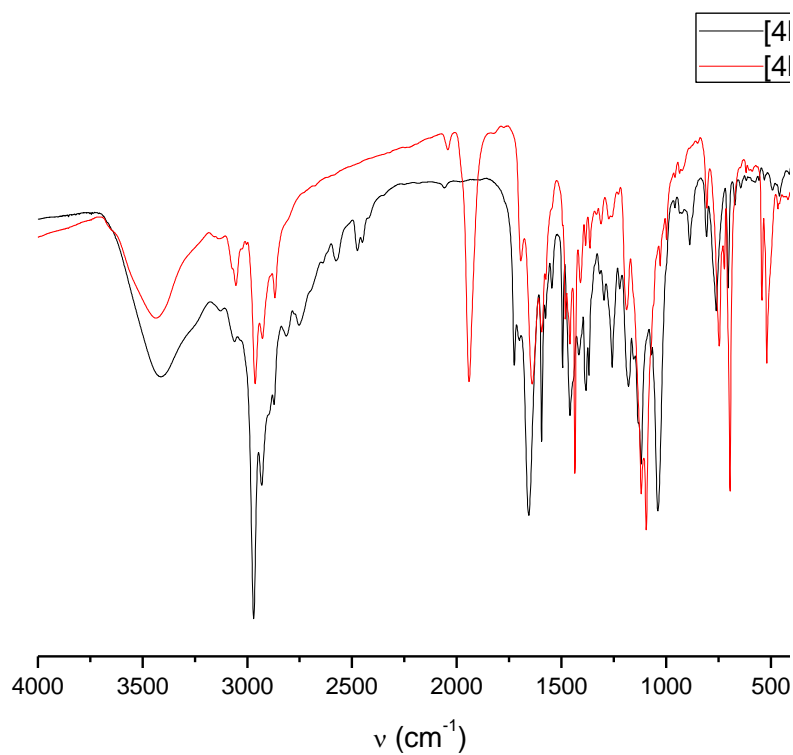

Figure S4

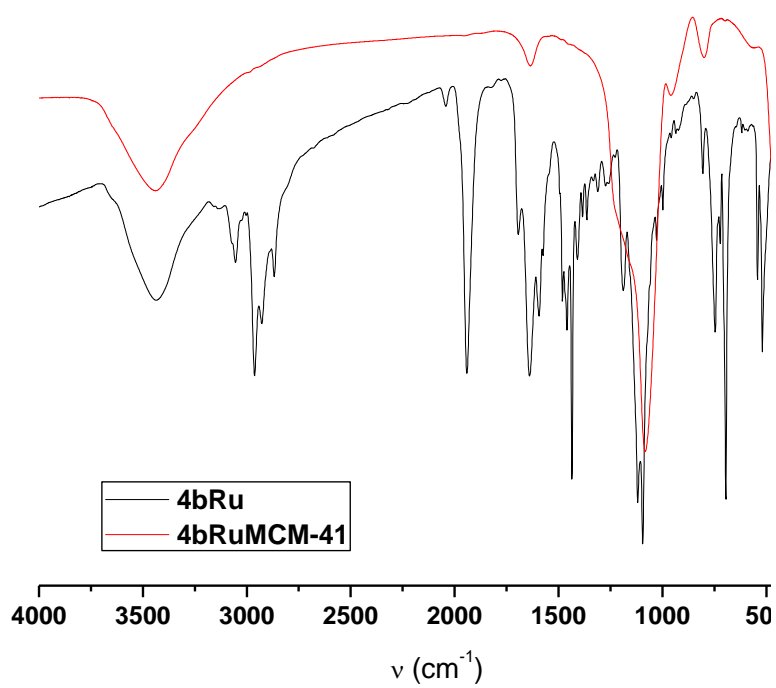

Figure S5A

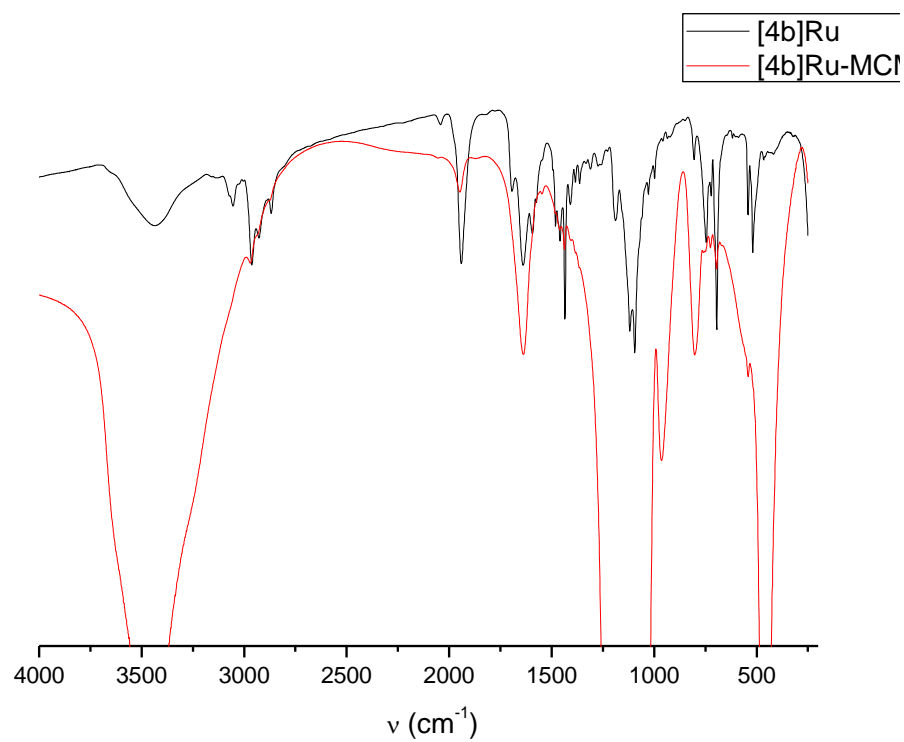

Figure S5B

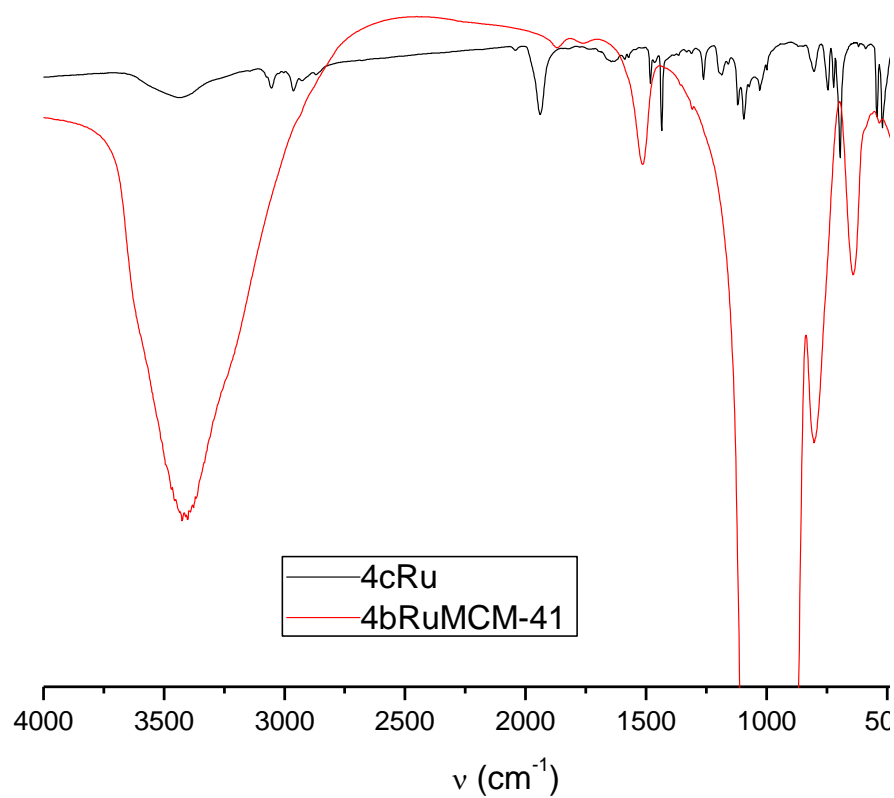

Figure S6

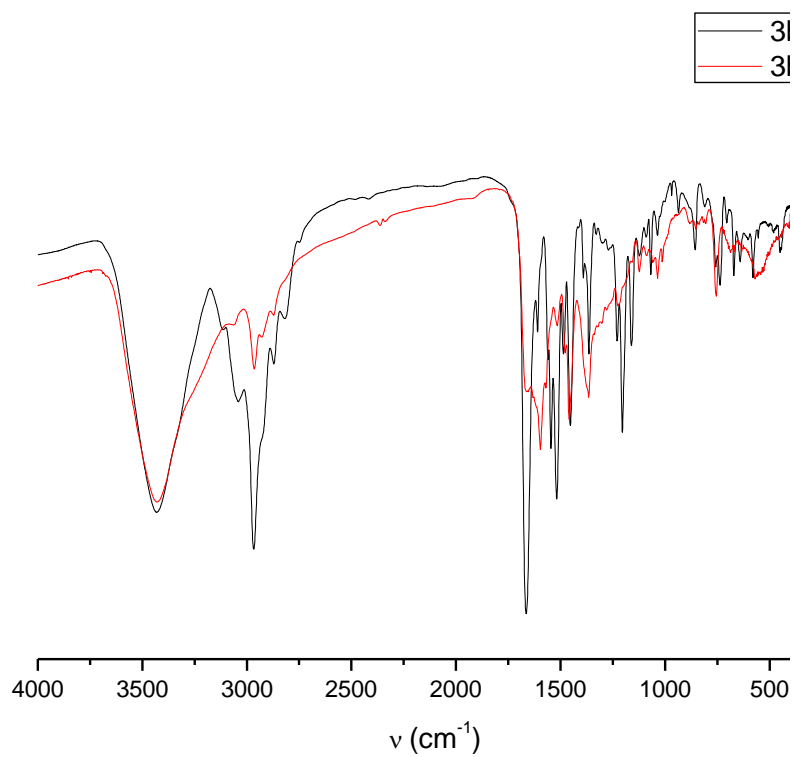

Figure S7

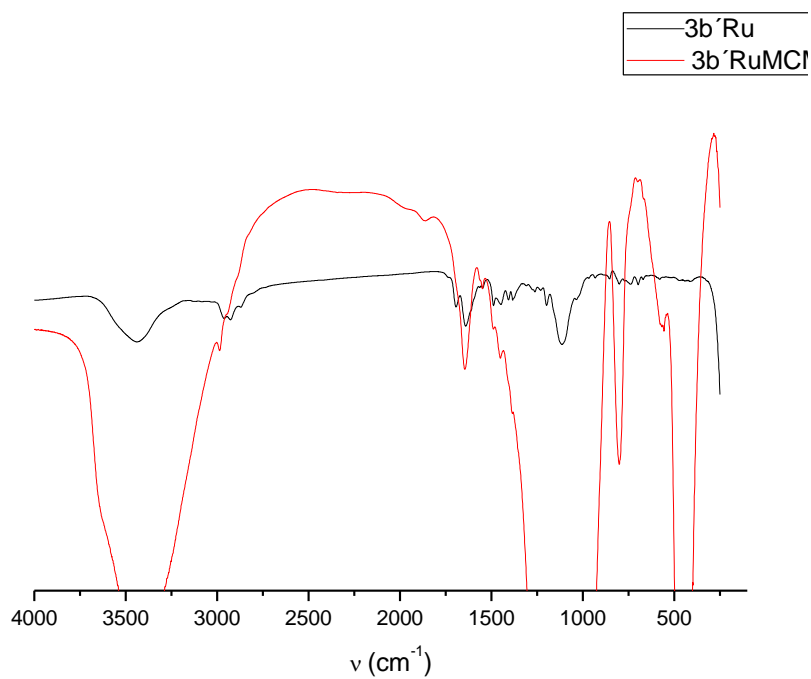

Figure S7

DRUV

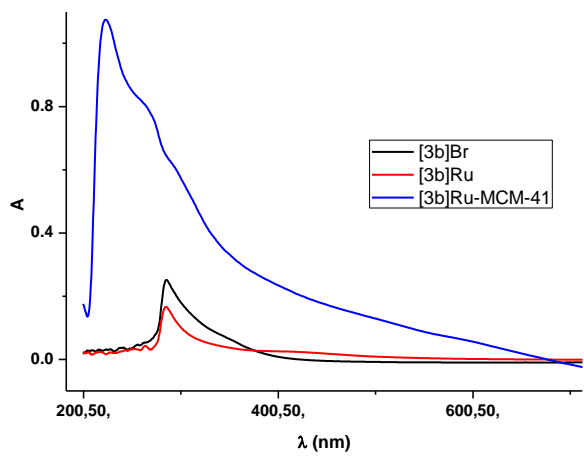

Figure S8

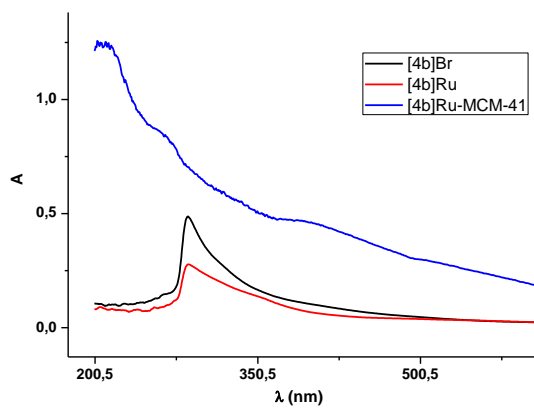

Figure S9

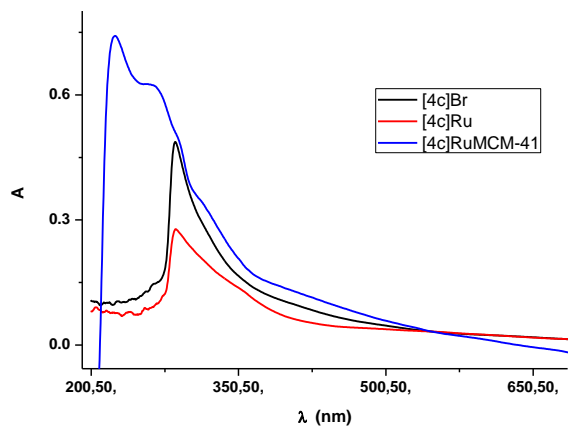

Figure S10

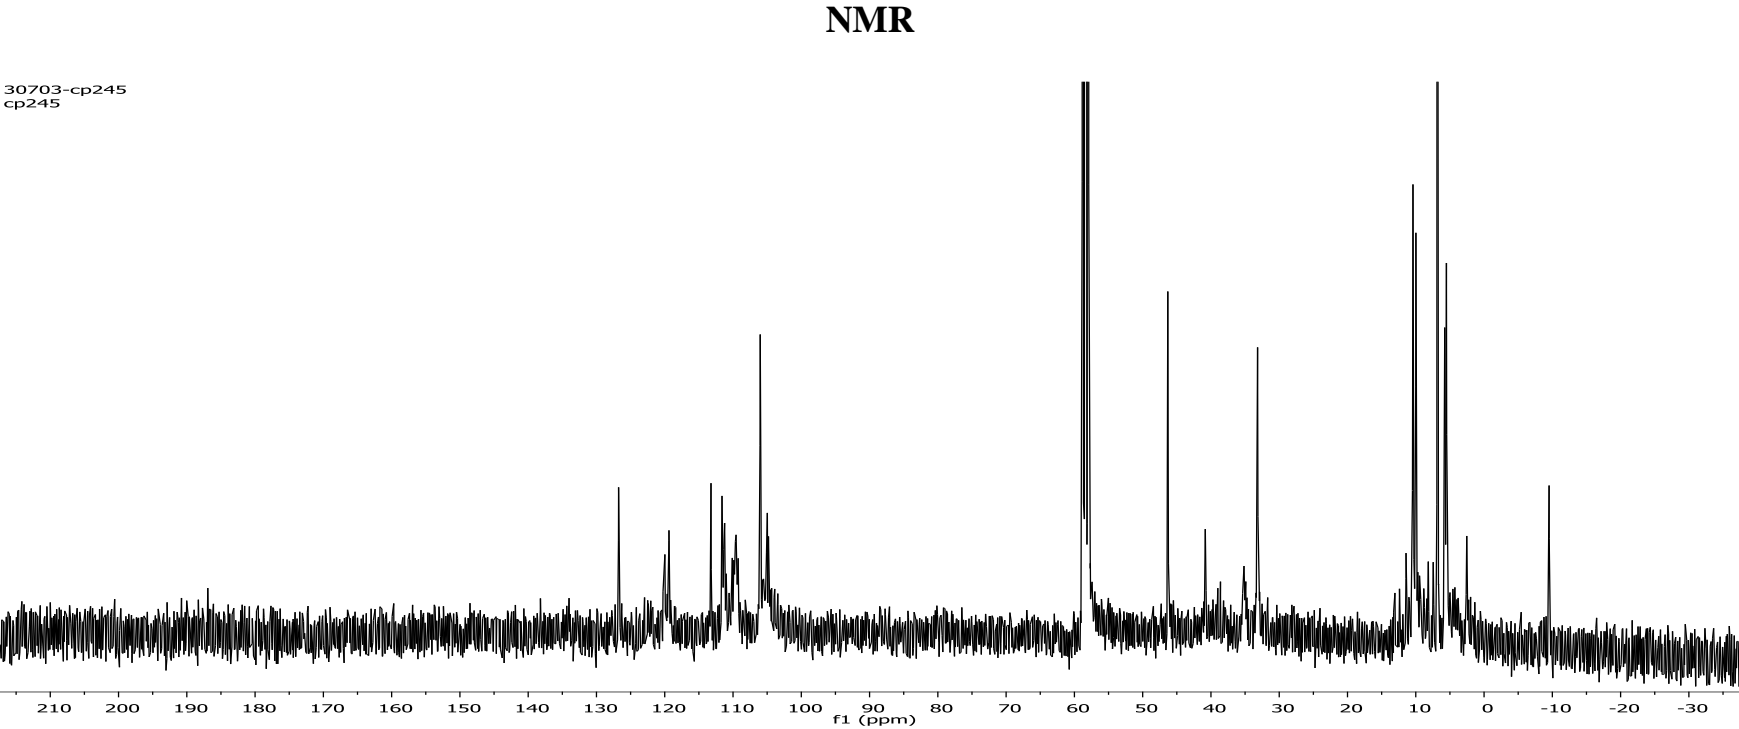

Figure S11.  $^{13}\text{C}$  NMR of **3bBr**



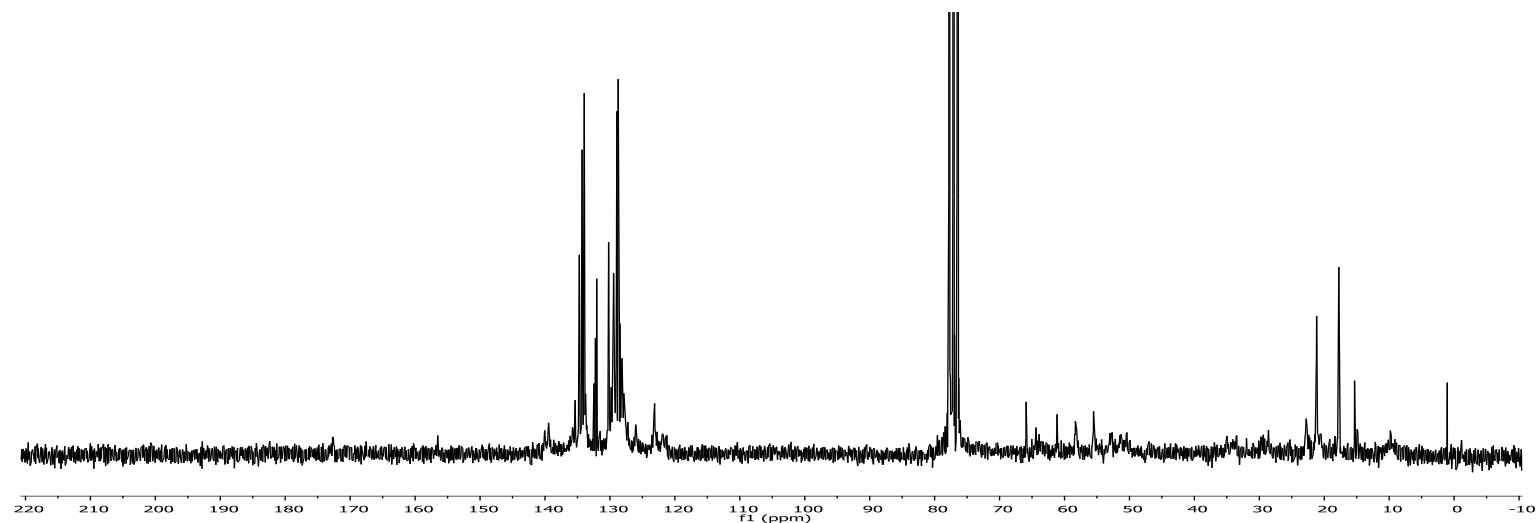

Figure S12.  $^{13}\text{C}$  NMR of **3bRu**

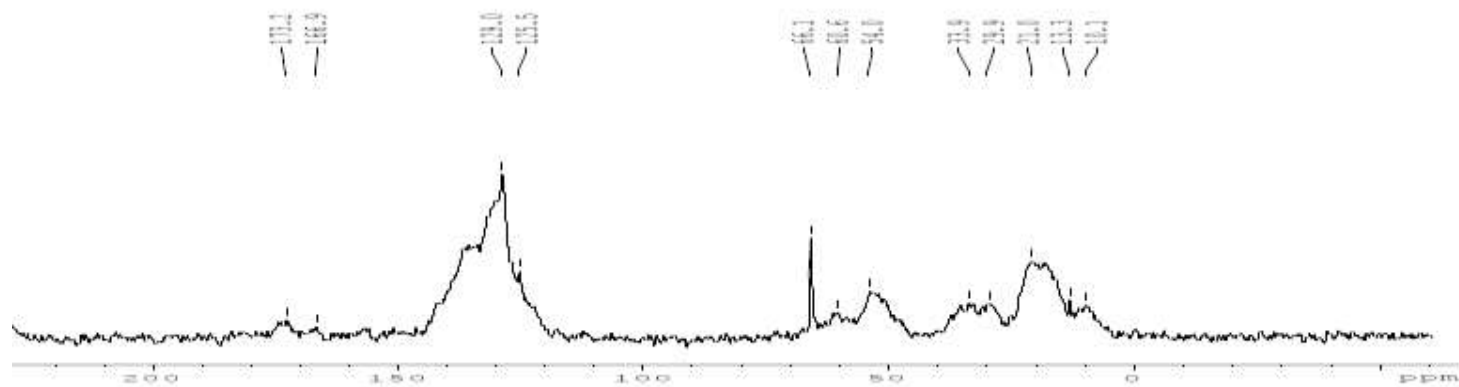

Figure S13.  $^{13}\text{C}$  NMR of **3bRuMCM-41**

30695-cp246  
cp246

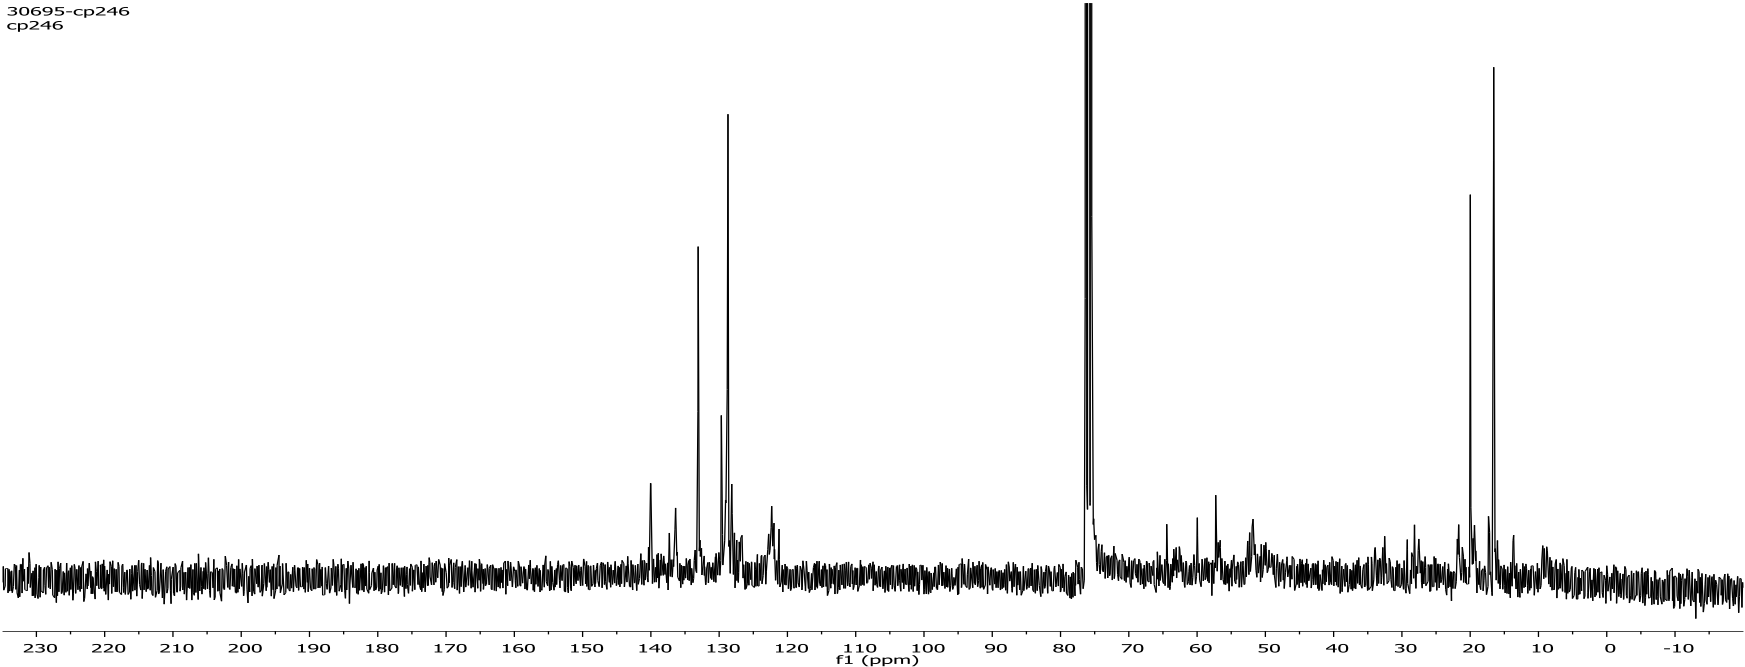

Figure S14.  $^{13}\text{C}$  NMR of **4cBr**

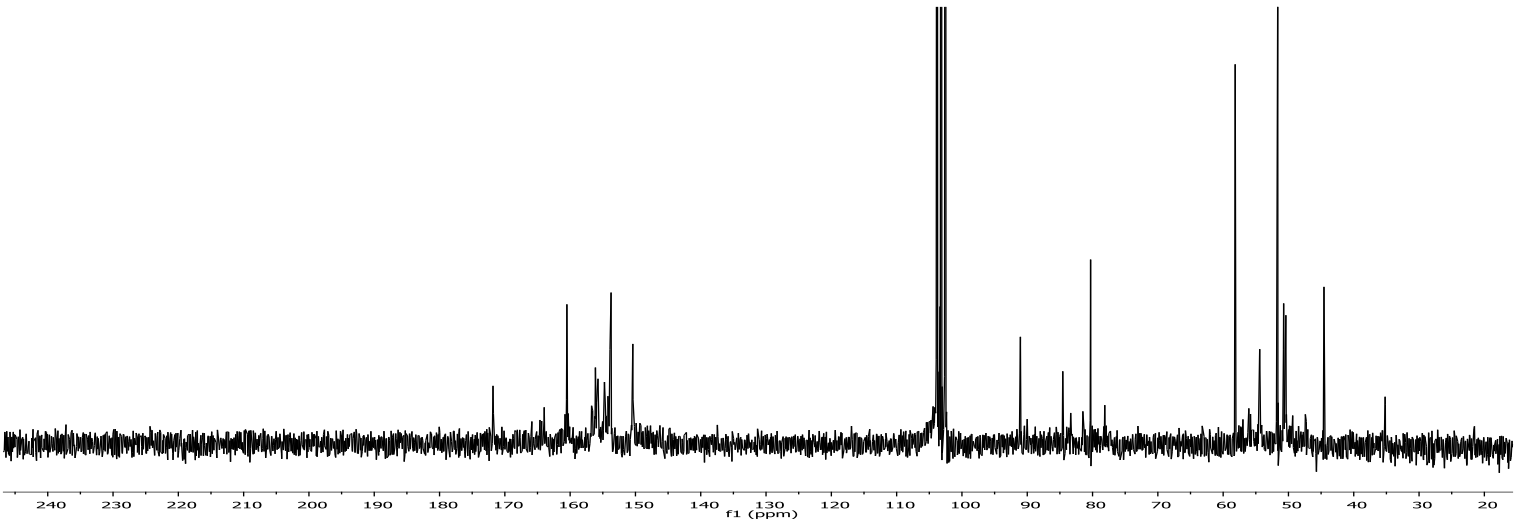

Figure S15.  $^{13}\text{C}$  NMR of **4cRu**

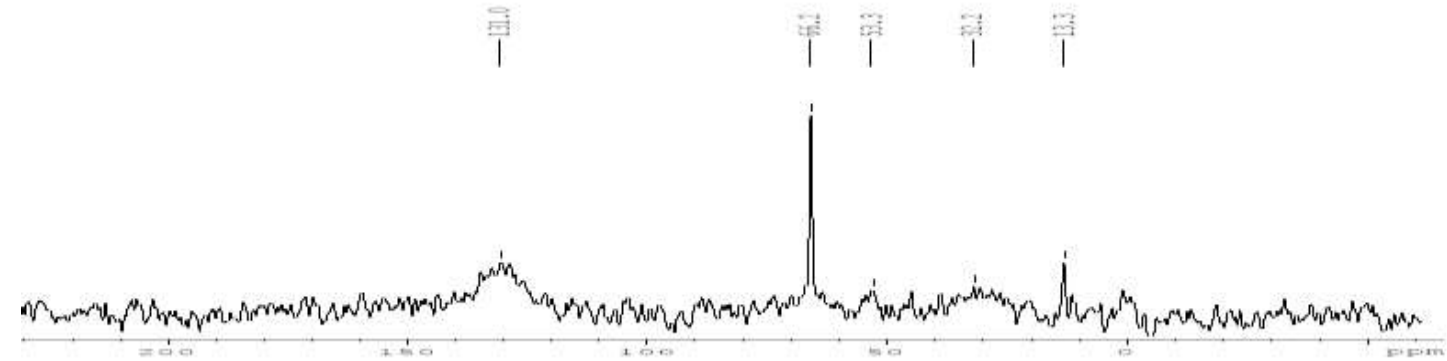

Figure S16.  $^{13}\text{C}$  NMR of **4cRuMCM-41**

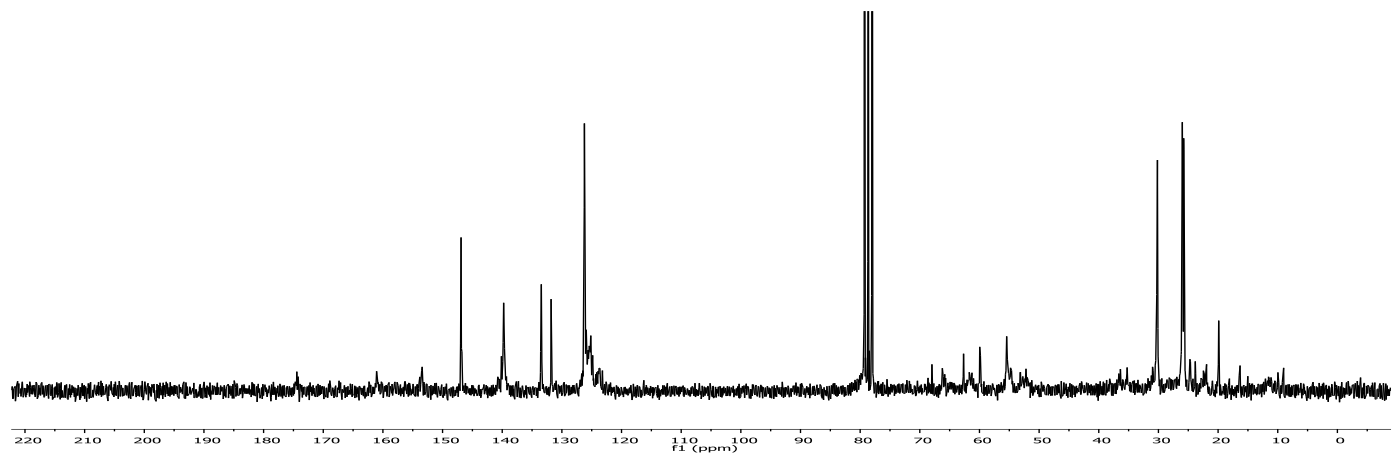

Figure S17.  $^{13}\text{C}$  NMR of **4bRu**

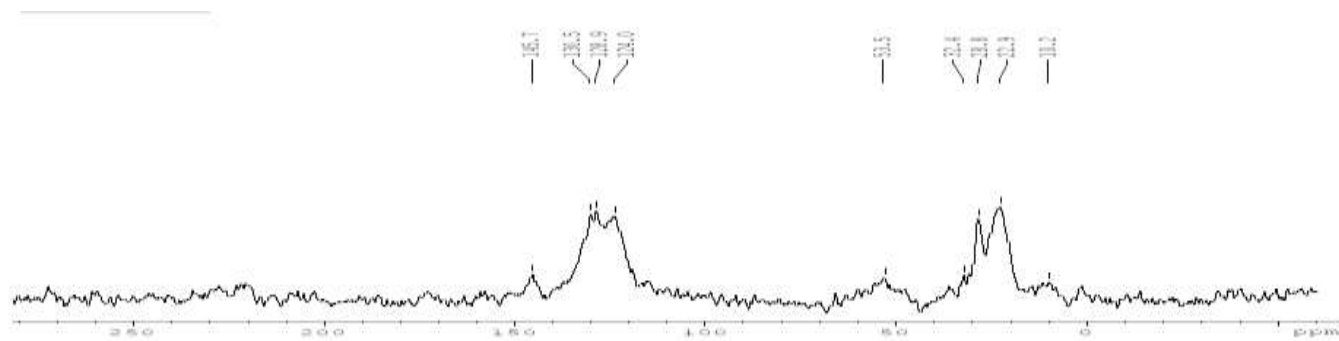

Figure S18.  $^{13}\text{C}$  NMR of **4bRuMCM-41**

## Catalytic Activity

Table 1. Catalytic hydrogenation of diethyl citraconate and (*E*)-diethyl 2-benzylidenesuccinate and with Ru catalysts<sup>a</sup>

| Entry | Catalyst                               | diethyl citraconate |                     | ( <i>E</i> )-diethyl 2-benzylidene succinate |                     |
|-------|----------------------------------------|---------------------|---------------------|----------------------------------------------|---------------------|
|       |                                        | TOF <sup>b</sup>    | ee (%) <sup>c</sup> | TOF <sup>b</sup>                             | ee (%) <sup>c</sup> |
| 1     | 3aRu <sup>c</sup>                      | 88                  | 5                   | 100                                          | 100(S)              |
| 2     | 3bRuMCM <sup>a</sup>                   | 1200                | 5                   | 400                                          | 98 (S)              |
| 3     | 4bRuMCM <sup>a</sup>                   | 1125                | 5                   | 390                                          | 99(S)               |
| 4     | 4cRuMCM <sup>a</sup>                   | 1321                | 5                   | 272                                          | 98(S)               |
| 5     | 3a <sub>p-cym</sub> Ru <sup>a</sup>    | 90                  | 5                   | 25                                           | 98(S)               |
| 6     | 3b <sub>p-cym</sub> RuMCM <sup>a</sup> | 160                 | 5                   | 28                                           | 99(S)               |

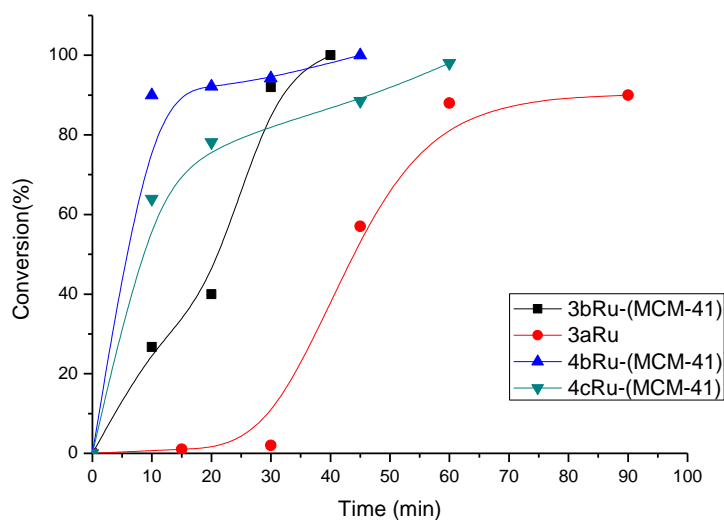

Figure S19. Kinetic profile for hydrogenation of diethyl citraconate with **3aRu**, **3bRuMCM-41**, **4bRu-MCM-41** and **4cRuMCM-41**.

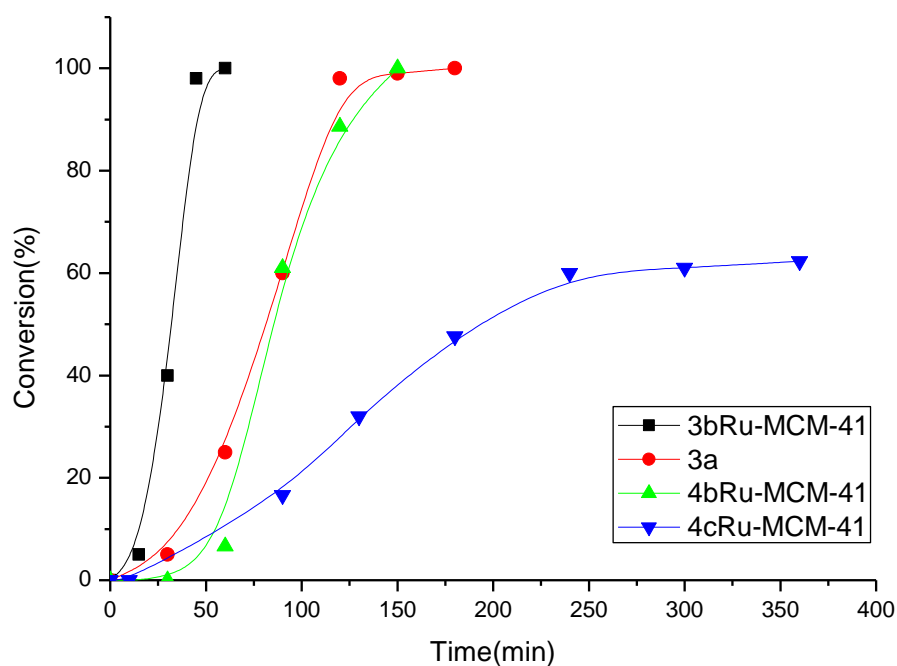

Figure S20. Kinetic profile for hydrogenation of (*E*)-diethyl 2-benzylidene succinate hydride-catalysts.

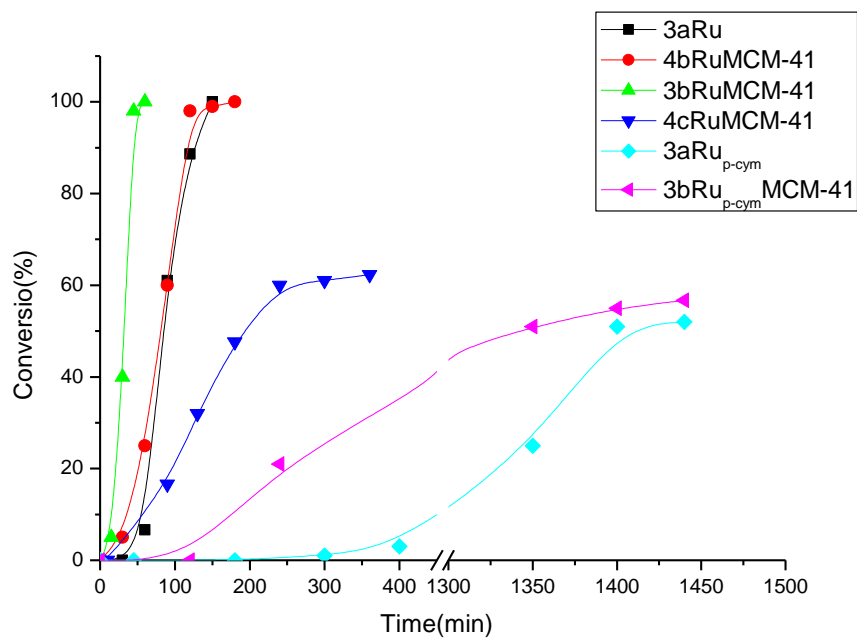

Figure S21. Hydride vs *p*-cymene-catalysts: kinetic profile for hydrogenation of (*E*)-diethyl 2-benzylidene succinate.

Table 2. Asymmetric hydrogenation of different substrates using **3bRuMCM-41** catalyst.

| Entry | Substrate                                                          | Conv | TOF  | ee(%) |
|-------|--------------------------------------------------------------------|------|------|-------|
| 1     | ( <i>E</i> )-diethyl 2-benzylidene succinate                       | 100  | 1400 | 98    |
| 2     | diethyl citraconate                                                | 100  | 1200 | 5     |
| 3     | (4 <i>Z</i> )-4-benzylidene-2-methyl-1,3-oxazol-5(4 <i>H</i> )-one | 99   | 535  | -     |
| 4     | (1-phenylethylidene)aniline                                        | 70   | 30   | 5     |
| 5     | 5-cyclohexyl-3,4-dihydro-2 <i>H</i> -pyrrole                       | 100  | 253  | 15    |

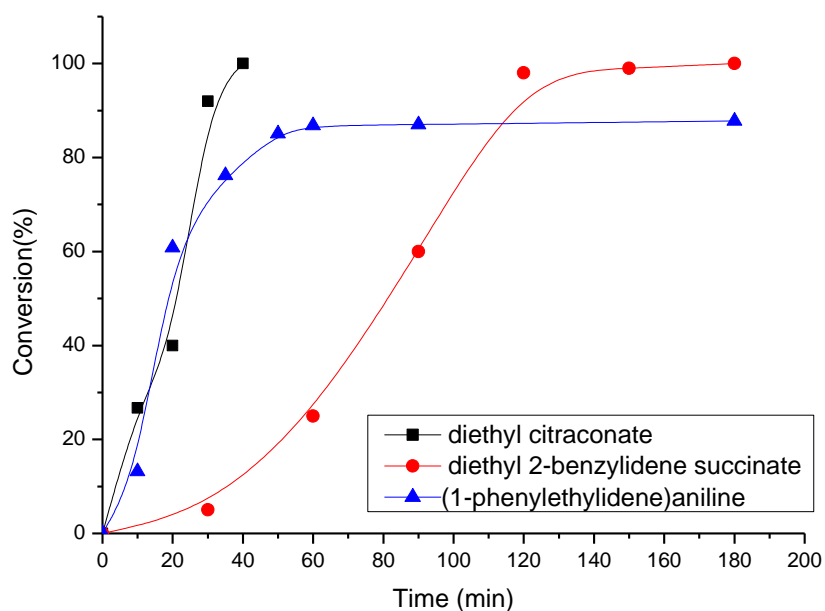

Figure S22. Kinetic profile for hydrogenation of alkenes with **3bRuMCM-41**

**Table 4.** Catalytic results for the cyclopropanation reaction involving styrenes and alkyl diazoacetates.

| Subs. | 3a'Ru <sub>p-cym</sub>   |                                 |                       |            | 3b'Ru <sub>p-cym</sub> MCM-41 |                                 |                       |            |
|-------|--------------------------|---------------------------------|-----------------------|------------|-------------------------------|---------------------------------|-----------------------|------------|
|       | Yield [%] <sup>[b]</sup> | <i>cis/trans</i> <sup>[c]</sup> | ee [%] <sup>[d]</sup> |            | Yield [%]                     | <i>cis/trans</i> <sup>[c]</sup> | ee [%] <sup>[d]</sup> |            |
|       |                          |                                 | <i>trans</i>          | <i>cis</i> |                               |                                 | <i>trans</i>          | <i>cis</i> |
| EDA   | 45 (48h)                 | 20/80                           | 77                    | 5          | 41 (48h)                      | 40/50                           | 65                    | 50         |
| PhEDA | 75 (10h)                 | 1/100                           | 5                     | -          | 25 (48h)                      | 1/100                           | 56                    | <5         |
| EDA   | 10 (48h)                 | 20/80                           | 5                     | 5          | Traces (48h)                  | -                               | -                     | -          |
| PhEDA | 100 (10h)                | 1/100                           | 5                     | -          | 15 (48h)                      | 1/100                           | <5                    | <5         |

[a] Catalyst loading: 5 mol%. [b] Selectivity towards cyclopropanes; the remaining diazo compound was converted into coupling products. [c] Diastereomeric selectivity: (*trans\_cis*)/*trans*+*cis*).



### HPLC Traces for hydrogenation reactions

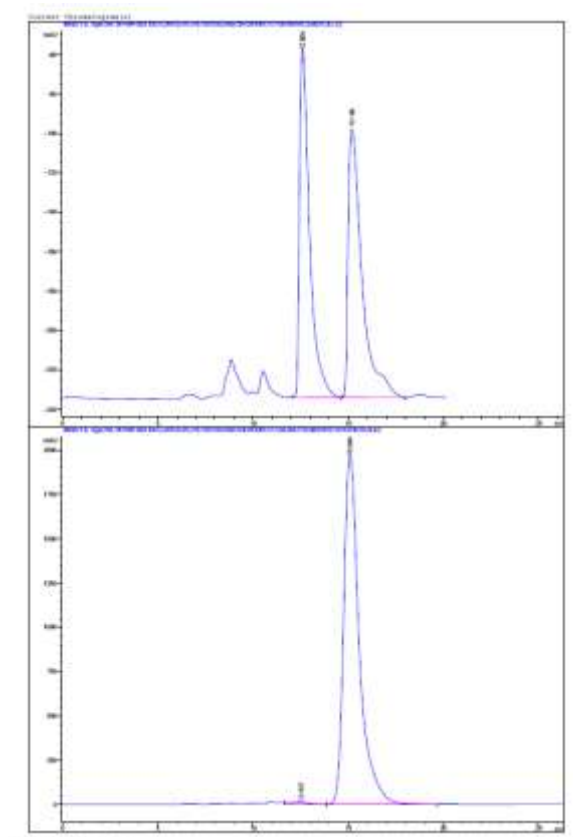

Figure S23. First cycle of Hydrogenation of (*E*)-diethyl 2-benzylidene succinate with **3bRuMCM-41**

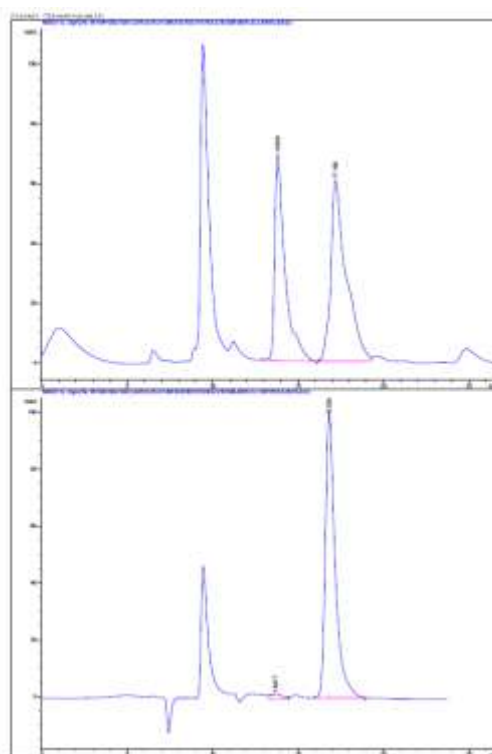

Figure S24. First cycle of hydrogenation of (*E*)-diethyl 2-benzylidene succinate with **4bRuMCM-41**

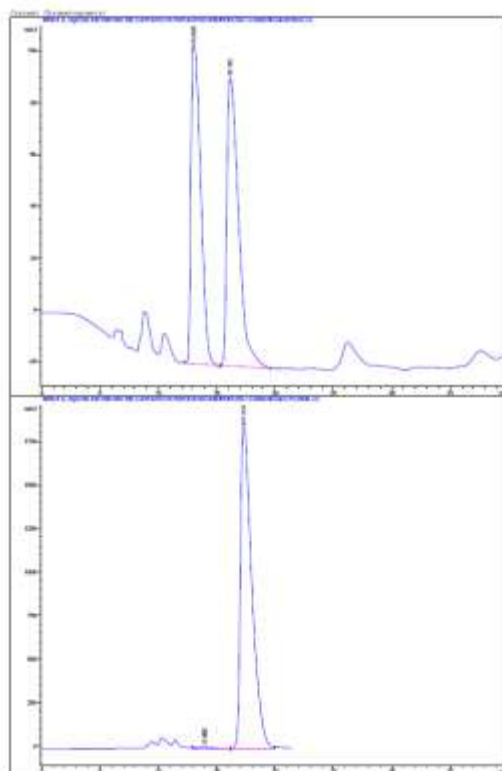

Figure S25. Second cycle of hydrogenation of (*E*)-diethyl 2-benzylidene succinate with **4bRuMCM-41**

### HPLC traces for cyclopropanation of styrene

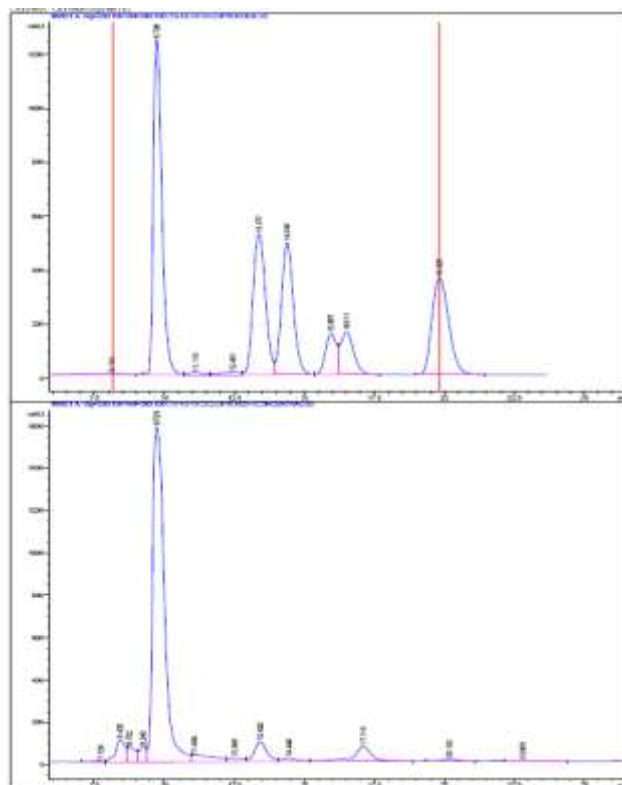

Figure S26. Cyclopropanation of styrene with EDA with **3b**  $\text{Ru}_{p\text{-cym}}$

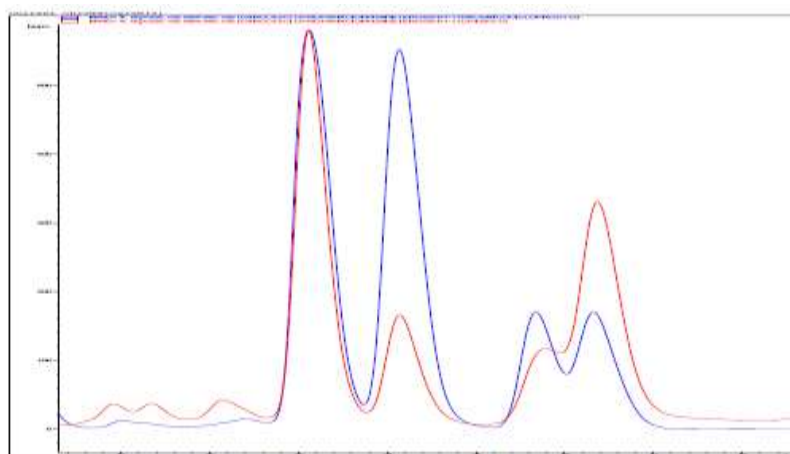

Figure S27. Cyclopropanation of styrene with EDA with **3b**  $\text{Ru}_{p\text{-cym}}$ -MCM-41

### Recycling experiments of hydrogenation reaction

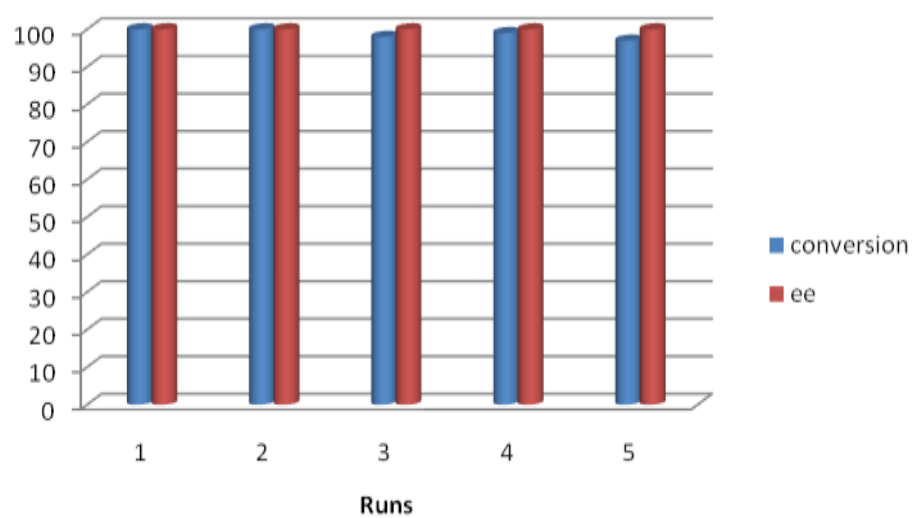

Figure S28

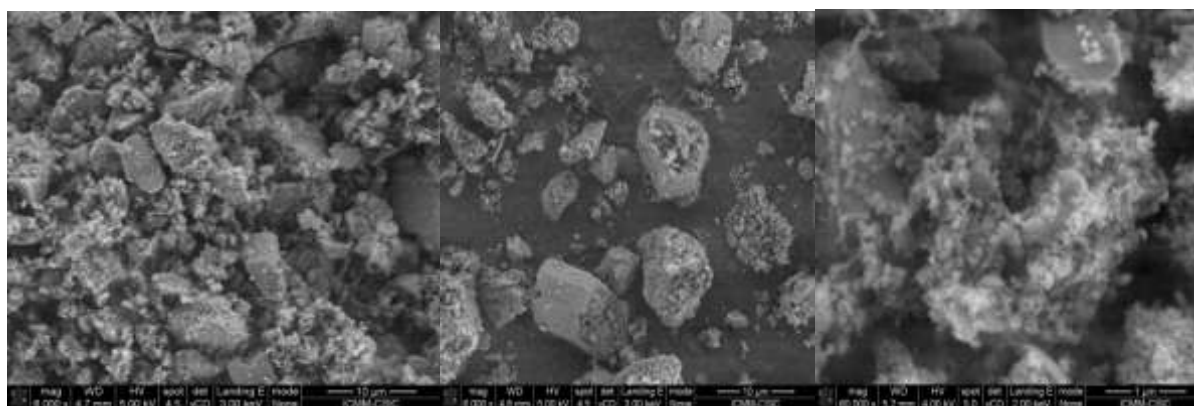

Figure S29. Scanning electron microscopy images (SEM) of **3bRuMCM-41** before reaction.

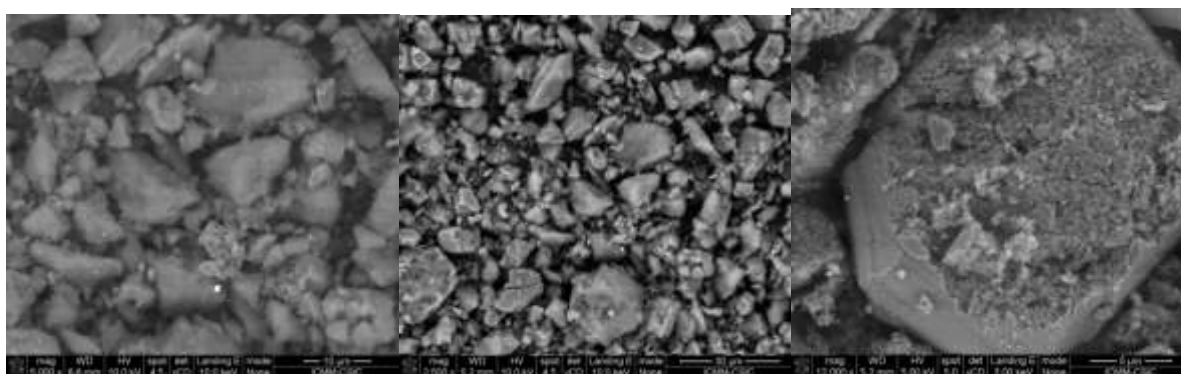

Figure S30. Scanning electron microscopy images (SEM) of **3bRuMCM-41** after reaction.

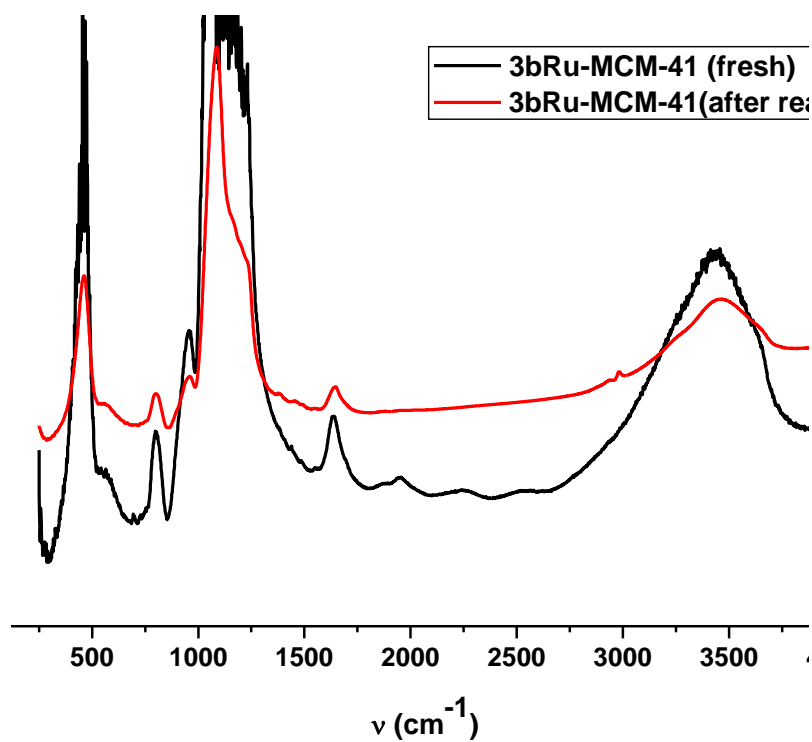

Figure S31

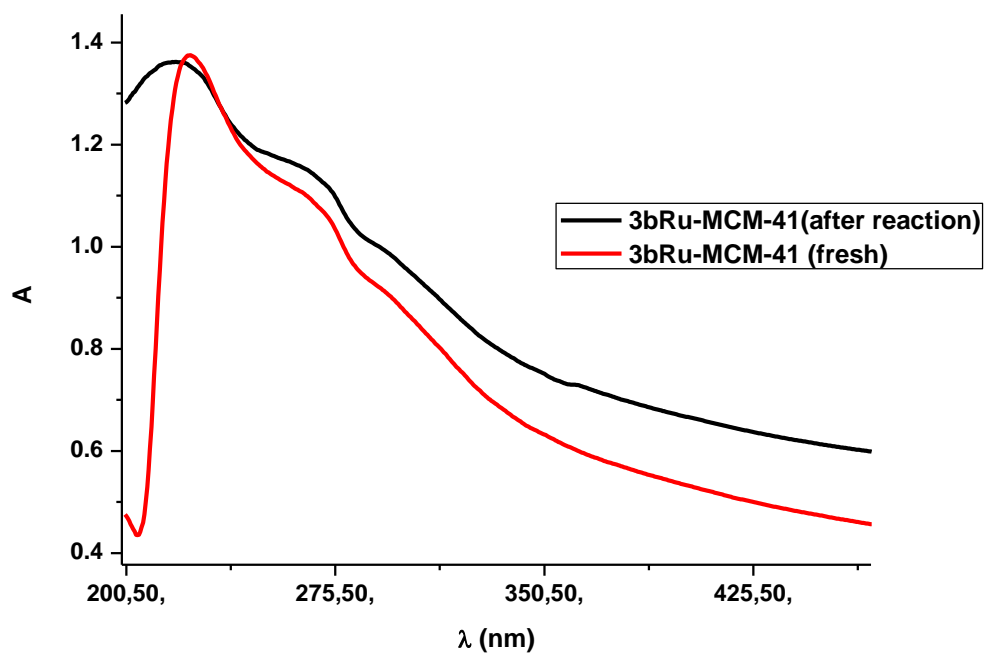

Figure S32

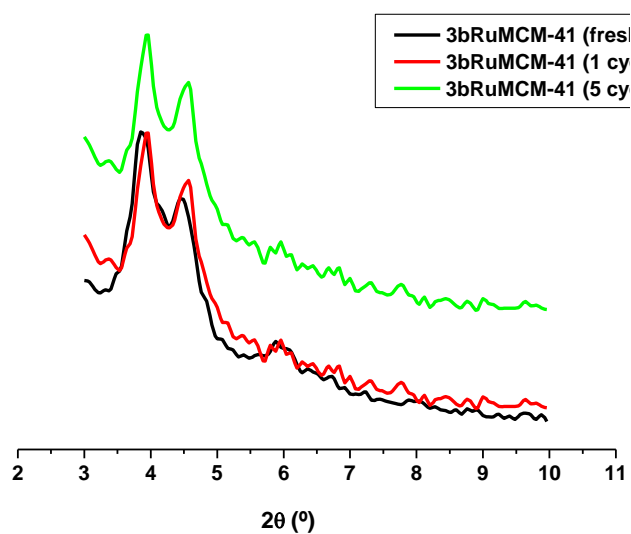

Figure S33. PXRD spectra of fresh **3dRuMCM-41** and this material recovered after fifth runs.

**Table 5.** Recycling experiments in the cyclopropanation of styrene with EDA catalyzed by **3b'Ru<sub>p-cym</sub>MCM-41** in CH<sub>2</sub>Cl<sub>2</sub> at room temperature

| Run | Yield[%] <sup>[a]</sup> | <i>cis/trans</i> | ee [%] <sup>[b]</sup> |            |
|-----|-------------------------|------------------|-----------------------|------------|
|     |                         |                  | <i>trans</i>          | <i>cis</i> |
| 1   | 41 (48h)                | 40/50            | 65                    | 50         |
| 2   | 30 (48h)                | 50/50            | 65                    | 50         |
| 3   | 30 (48h)                | 50/50            | 65                    | 50         |

<sup>[a]</sup> Selectivity toward cyclopropanecarboxylates. <sup>[b]</sup> Determined by chiral HPLC and GC.
